# Supplementary material for: Multimodal neuroimaging changes and their behavioral, genetic, and neurotransmitter correlates in electroconvulsive therapy for major depressive disorder
Source: Research Square preprint supplement (doi:10.21203/rs.3.rs-7327954/v1), 2025-10-15
Supplement: Supplementary file 1 [file 7f2b7d319355d0093a11139c.docx]

**Multimodal neuroimaging changes and their behavioral, genetic, and neurotransmitter correlates in electroconvulsive therapy for major depressive disorder**

1. **Search formulas：**
2. **Jackknife sensitivity analysis (Table S1-S2)**
3. **The full name and role of genes (Table S3)**
4. **Search formulas：**
   1. **FMRI research retrieval formula:**

Pubmed

((“MDD”[Title/Abstract]) OR (“major depressive disorder”[Title/Abstract]) OR (“unipolar depression”[Title/Abstract]) OR (“depressive disorder”[Title/Abstract]) OR (“depression”[Title/Abstract]) OR (“depressed”[Title/Abstract])) AND ((“functional magnetic resonance imaging”[Title/Abstract]) OR (“fMRI”[Title/Abstract]) OR (“amplitude of low frequency fluctuation”[Title/Abstract]) OR (“ALFF”[Title/Abstract]) OR (“low frequency fluctuation”[Title/Abstract]) OR (“LFF”[Title/Abstract]) OR (“amplitude of low frequency oscillation”[Title/Abstract]) OR (“LFO”[Title/Abstract]) OR (“regional homogeneity”[Title/Abstract]) OR (“ReHo”[Title/Abstract])) AND ((“electroconvulsive therapy”[Title/Abstract]) OR “ECT”[Title/Abstract]))

Web of science

(AB=(MDD) OR AB=(major depressive disorder) OR AB=(unipolar depression) OR AB=(depressive disorder) OR AB=(depression) OR AB=(depressed)) AND (AB=(functional magnetic resonance imaging) OR AB=(fMRI) OR AB=(amplitude of low frequency fluctuation) OR AB=(ALFF) OR AB=(low frequency fluctuation) OR AB=(LFF) OR AB=(amplitude of low frequency oscillation) OR AB=(LFO) OR AB=(regional homogeneity) OR AB=(ReHo)) AND (AB=(electroconvulsive therapy) OR AB=(ECT))

Embase

(‘MDD’:ab,ti OR ‘major depressive disorder’:ab,ti OR ‘unipolar depression’:ab,ti OR ‘depressive disorder’:ab,ti OR ‘depression’:ab,ti OR ‘depressed’:ab,ti) AND (‘amplitude of low frequency fluctuation’:ab,ti OR ‘ALFF’:ab,ti OR ‘low frequency fluctuation’:ab,ti OR ‘LFF’:ab,ti OR ‘amplitude of low frequency oscillation’:ab,ti OR ‘LFO’:ab,ti OR ‘regional homogeneity’:ab,ti OR ‘ReHo’:ab,ti)

- 1. **SMRI FMRI research retrieval formula:**

Pubmed

((“MDD”[Title/Abstract]) OR (“major depressive disorder”[Title/Abstract]) OR (“unipolar depression”[Title/Abstract]) OR (“depressive disorder”[Title/Abstract]) OR (“depression”[Title/Abstract]) OR (“depressed”[Title/Abstract])) AND ((“structural magnetic resonance imaging”[Title/Abstract]) OR (“morphometry”[Title/Abstract]) OR (“voxel-based”[Title/Abstract]) OR (“voxel-wise”[Title/Abstract]) OR (“voxel-based morphometry”[Title/Abstract]) OR (“VBM”[Title/Abstract]) OR (“high-resolution imaging”[Title/Abstract]) OR (“structural neuroimaging”[Title/Abstract]) OR (“grey matter”[Title/Abstract]) OR (“gray matter”[Title/Abstract])) AND ((“electroconvulsive therapy”[Title/Abstract]) OR “ECT”[Title/Abstract]))

Web of science

(AB=(MDD) OR AB=(major depressive disorder) OR AB=(unipolar depression) OR AB=(depressive disorder) OR AB=(depression) OR AB=(depressed)) AND (AB=(structural magnetic resonance imaging) OR AB=(morphometry) OR AB=(voxel-based) OR AB=(voxel-wise) OR AB=(voxel-based morphometry) OR AB=(VBM) OR AB=(high-resolution imaging) OR AB=(structural neuroimaging) OR AB=(grey matter) OR AB=(gray matter)) AND (AB=(electroconvulsive therapy) OR AB=(ECT))

Embase

(‘MDD’:ab,ti OR ‘major depressive disorder’:ab,ti OR ‘unipolar depression’:ab,ti OR ‘depressive disorder’:ab,ti OR ‘depression’:ab,ti OR ‘depressed’:ab,ti) AND (‘structural magnetic resonance imaging’:ab,ti OR ‘morphometry’:ab,ti OR ‘voxel-based’:ab,ti OR ‘voxel-wise’:ab,ti OR ‘voxel-based morphometry’:ab,ti OR ‘VBM’:ab,ti OR ‘high-resolution imaging’:ab,ti OR ‘structural neuroimaging’:ab,ti OR ‘grey matter’:ab,ti OR ‘gray matter’:ab,ti) AND (‘electroconvulsive therapy’:ab,ti OR ‘ECT’:ab,ti)

1. **Jackknife sensitivity analysis**

**Table S1:** Jackknife sensitivity analysis of cumulative knife for differences in brain function activity before and after ECT treatment

| All studies | Left inferior frontal gyrus, orbital part | Left angular gyrus, BA 39 | Right cerebellum, hemispheric lobule VI, BA 37 | Right middle frontal gyrus, orbital part |
| --- | --- | --- | --- | --- |
| Qiu et al.,2019 | Yes | Yes | Yes | Yes |
| Liu et al.,2015 | Yes | Yes | Yes | No |
| Kong et al.,2017 | Yes | Yes | Yes | Yes |
| Wang et al.,2023 | Yes | Yes | Yes | Yes |
| Zhang et al.,2020 | No | Yes | No | No |
| Mo et al.,2020 | Yes | No | Yes | Yes |
| Argyelan et al.,2016 | Yes | Yes | No | Yes |
| Du et al.,2015 | Yes | Yes | Yes | Yes |
| Qian et al.,2025 | Yes | Yes | Yes | Yes |
| Wu et al.,2025 | Yes | No | No | No |
| Total | 9/10 | 8/10 | 7/10 | 7/10 |

Abbreviation: ECT, electroconvulsive therapy.

**Table S2:** Jackknife sensitivity analysis of cumulative knife for changes in brain structure before and after ECT treatment

| All studies | Right temporal pole, superior temporal gyrus | Right insula, BA 48 | Left parahippocampal gyrus | Right superior frontal gyrus, medial, BA 10 | Right superior frontal gyrus, medial orbital, BA 11 | Left inferior parietal (excluding supramarginal and angular) gyri, BA 40 | Left angular gyrus, BA 39 | Right inferior parietal (excluding supramarginal and angular) gyri, BA 40 |
| --- | --- | --- | --- | --- | --- | --- | --- | --- |
| Xu et al.,2019 | Yes | Yes | Yes | No | Yes | No | Yes | No |
| Depping et al.,2017 | Yes | Yes | Yes | Yes | Yes | No | Yes | Yes |
| Long et al.,2025 | Yes | Yes | Yes | Yes | Yes | Yes | Yes | Yes |
| Redlich et al.,2016 | Yes | Yes | Yes | Yes | No | Yes | Yes | Yes |
| Sartorius et al.,2018 | Yes | Yes | Yes | Yes | Yes | Yes | Yes | Yes |
| zhang et al.,2021 | Yes | Yes | Yes | Yes | Yes | Yes | Yes | Yes |
| Wu et al.,2022 | Yes | Yes | Yes | Yes | Yes | Yes | Yes | No |
| Cano et al.,2023 | Yes | Yes | Yes | Yes | Yes | Yes | Yes | Yes |
| Ota et al.,2015 | Yes | Yes | Yes | Yes | Yes | Yes | Yes | Yes |
| Cano et al.,2017 | Yes | Yes | Yes | Yes | Yes | Yes | Yes | Yes |
| Borgers et al.,2023 | Yes | Yes | Yes | Yes | Yes | Yes | Yes | Yes |
| Total | 11/11 | 11/11 | 11/11 | 10/11 | 10/11 | 9/11 | 11/11 | 9/11 |

**Table S3:** Top 10 genes expressed in the left angular gyrus

| **Gene Symbol** | **Full Name** | **Encoded Protein** | **Function** |
| --- | --- | --- | --- |
| TFAP2B | Transcription Factor AP-2 Beta | AP-2β Transcription Factor | Regulates neural crest development and adipocyte differentiation |
| OTX2 | Orthodenticle Homeobox 2 | OTX2 Homeoprotein | Critical for forebrain and eye development |
| SPINK6 | Serine Peptidase Inhibitor Kazal Type 6 | SPINK6 Protein | Maintains skin barrier integrity through serine protease inhibition |
| NRK | Nik Related Kinase | NRK Kinase | Regulates cytoskeletal organization and neuronal migration |
| OMES | Eomesodermin | T-box Brain Protein 2 (TBR2) | Essential for T-cell differentiation and cortical neurogenesis |
| CPLX4 | Complexin 4 | Complexin-4 | Modulates synaptic vesicle release in inhibitory neurons |
| ZNF663 | Zinc Finger Protein 663 | ZNF663 Transcription Factor | Involved in RNA processing and transcriptional regulation |
| MAB21L1 | Mab-21 Like 1 | MAB21L1 Determinant Protein | Controls cell fate decisions during embryonic development |
| IRF6 | Interferon Regulatory Factor 6 | IRF6 Transcription Factor | Regulates epithelial cell differentiation and orofacial development |
| RNF133 | Ring Finger Protein 133 | E3 Ubiquitin-Protein Ligase RNF133 | Mediates protein ubiquitination and degradation |
